# Supplementary material
Source: PubMed Central journal article supplement (PMC9842605)

**S1 File.** Original uncropped and unadjusted gel electrophoresis images of Figures 1 and 2C. The other figures are of original images.

**Fig 1A**

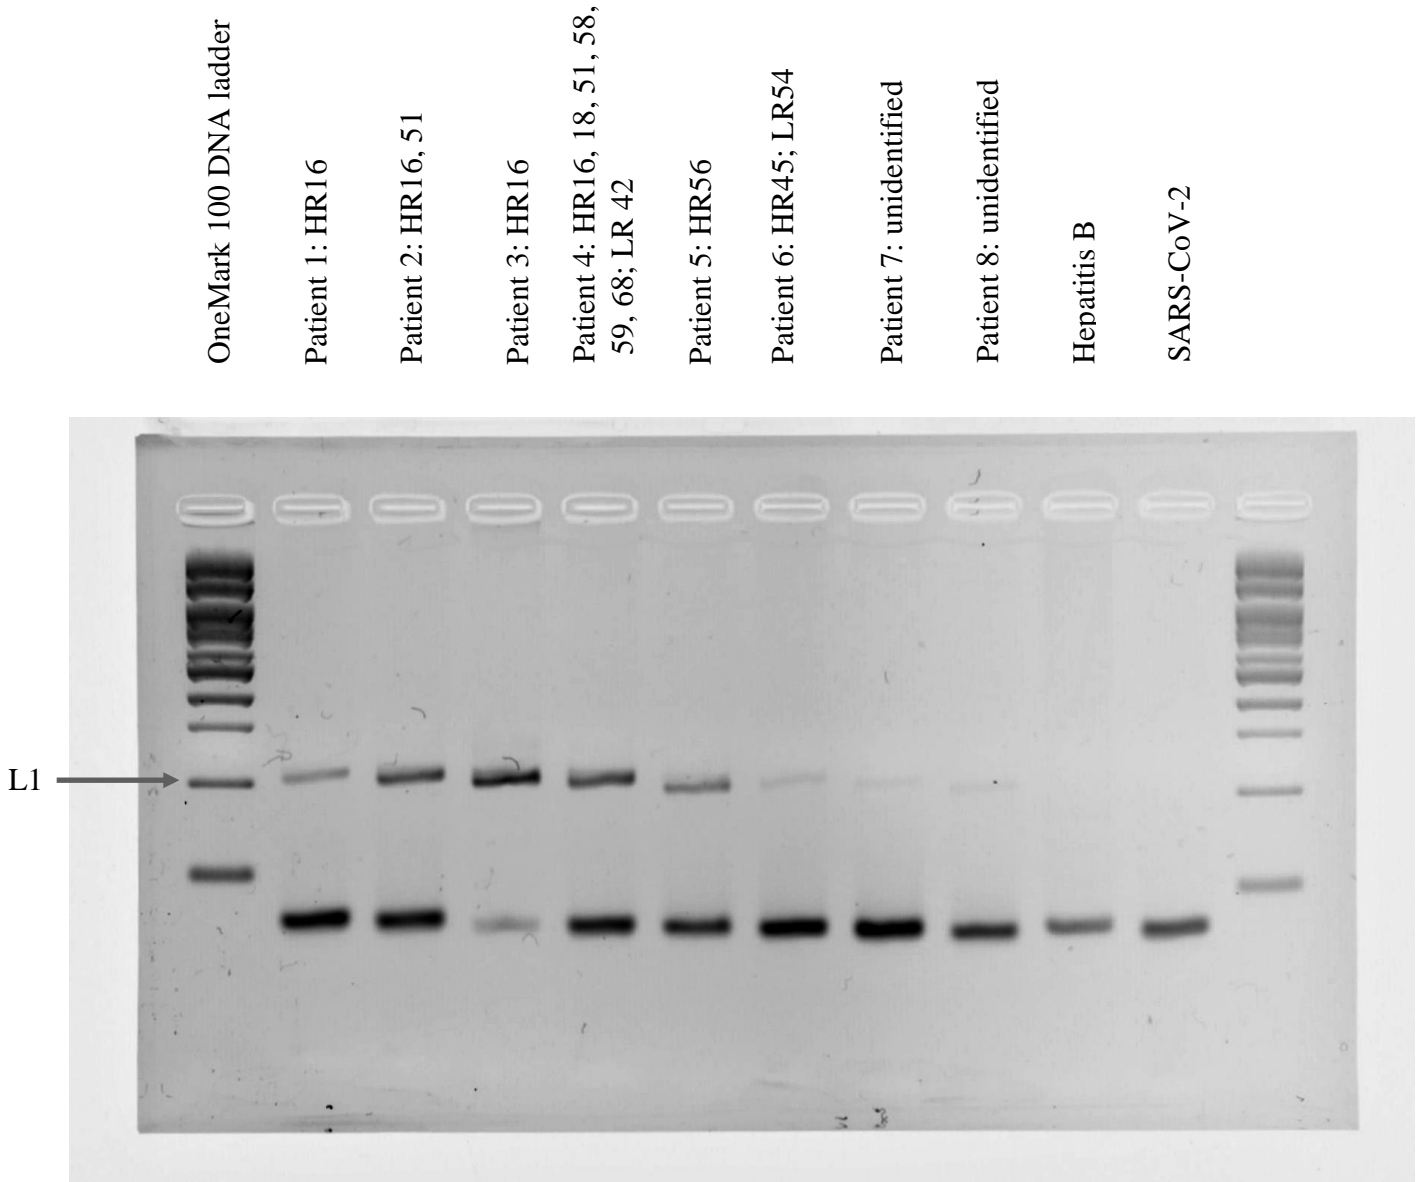

OneMark 100  
DNA ladder

Influenza A

Influenza B

*C. trachomatis*

*N. gonorrhoeae*

*S. saprophyticus*

*S. aureus*

*S. epidermidis*

*E. coli*  
(contaminated)

*H. sapiens*

*M. musculus*

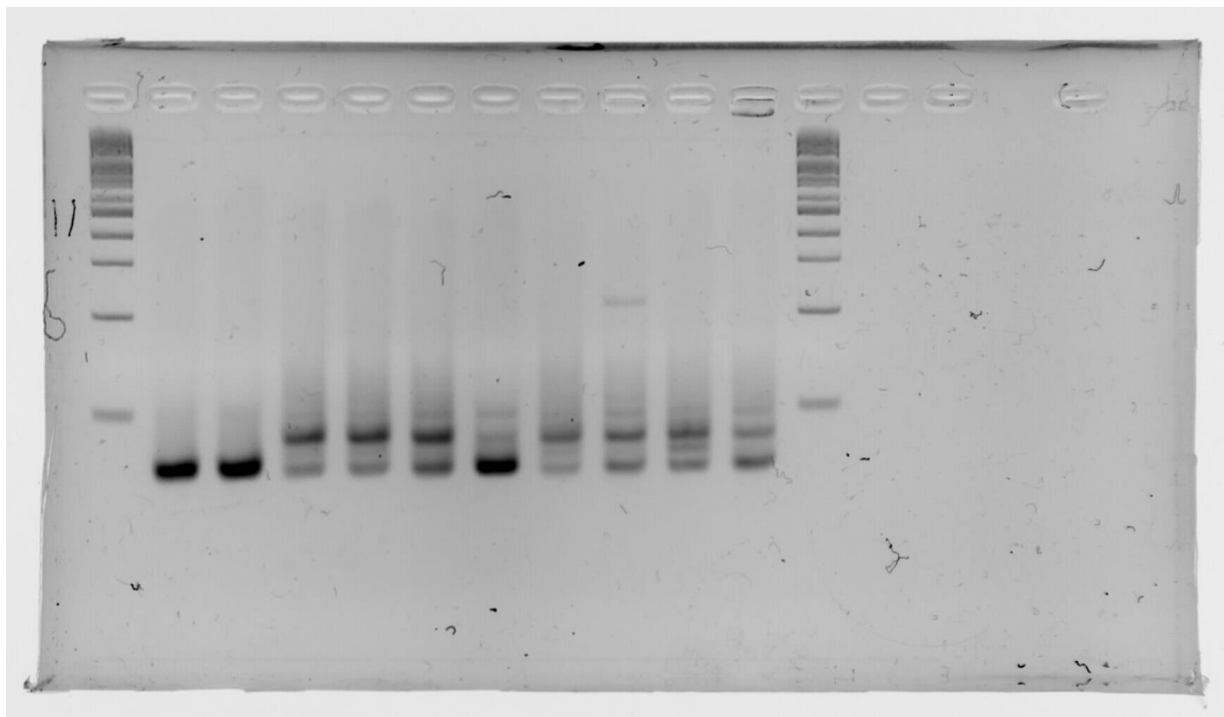

*S. aureus*

*S. epidermidis*

*E. coli*  
(more template)

*E. coli*

other works

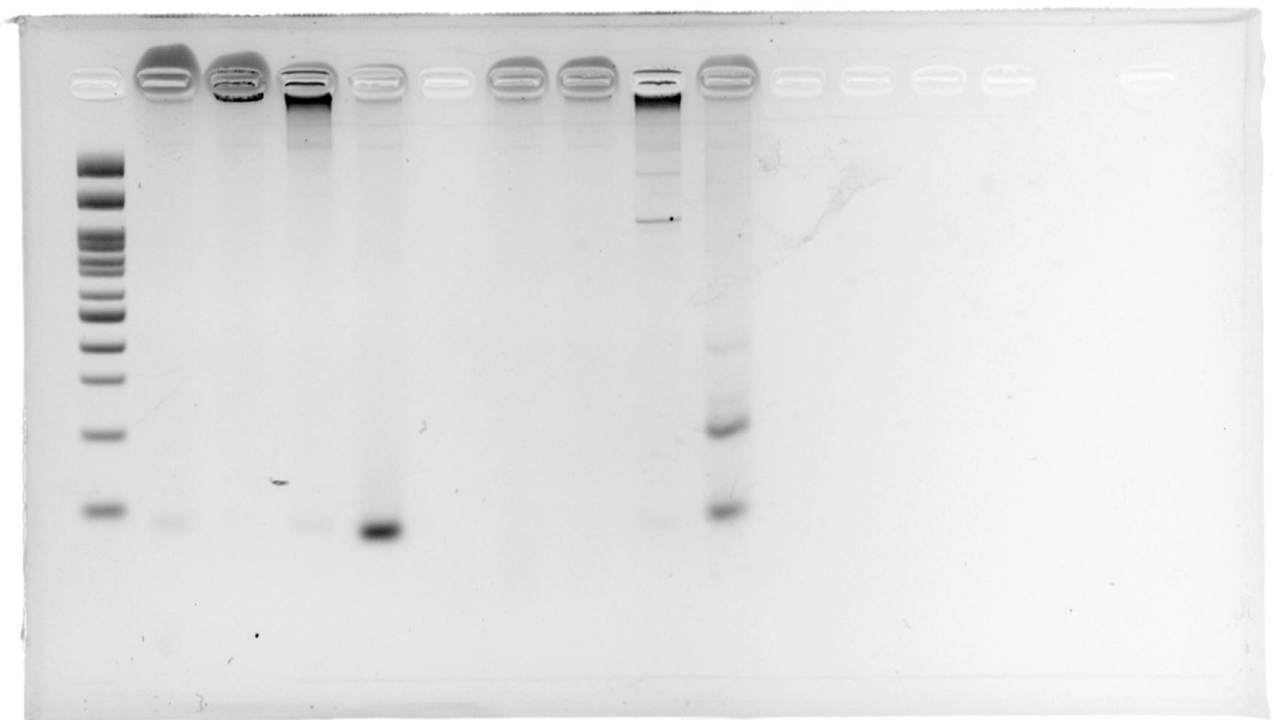

**Fig 1B**

Patient 9: HR16, 45, 52; LR6, 42

Patient 10: HR66; LR42

Other positive and negative  
patient samples

---

L1 →

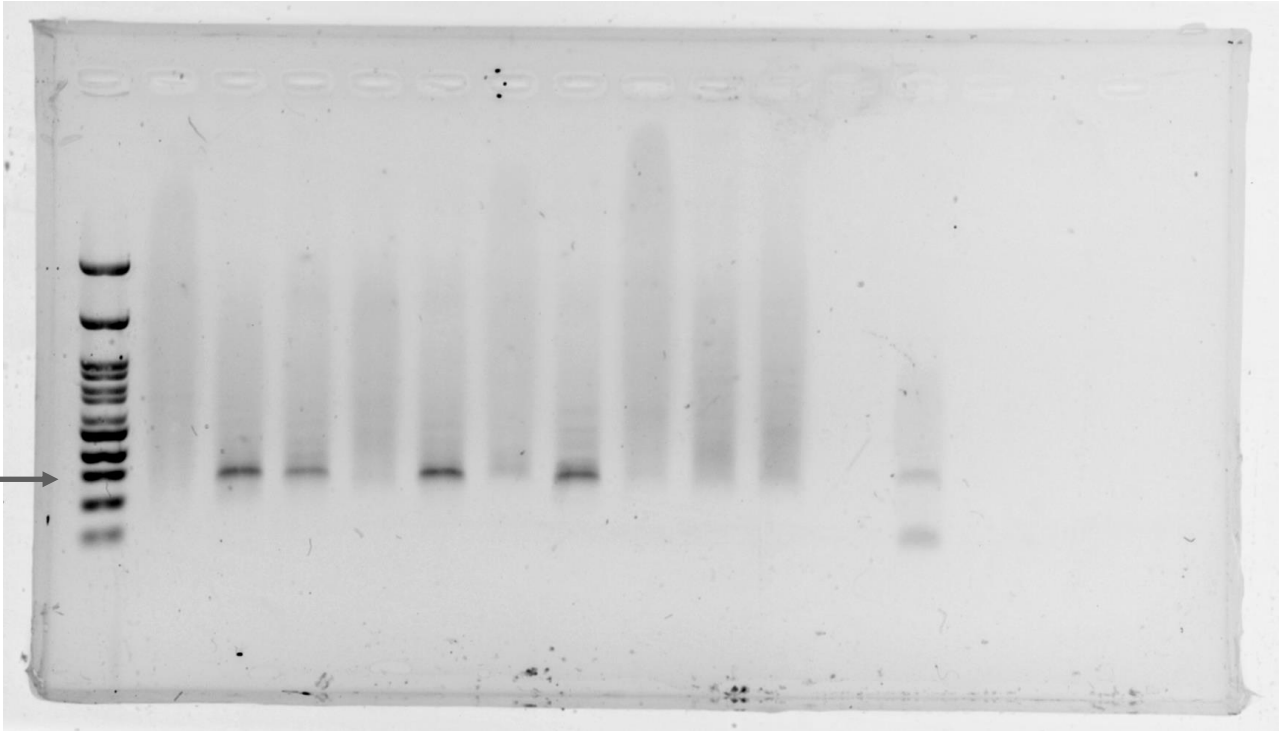

Other positive  
and negative  
patient samples

---

Patient 11: HR16, 51

Patient 12: HR66

Other positive and negative  
patient samples

---

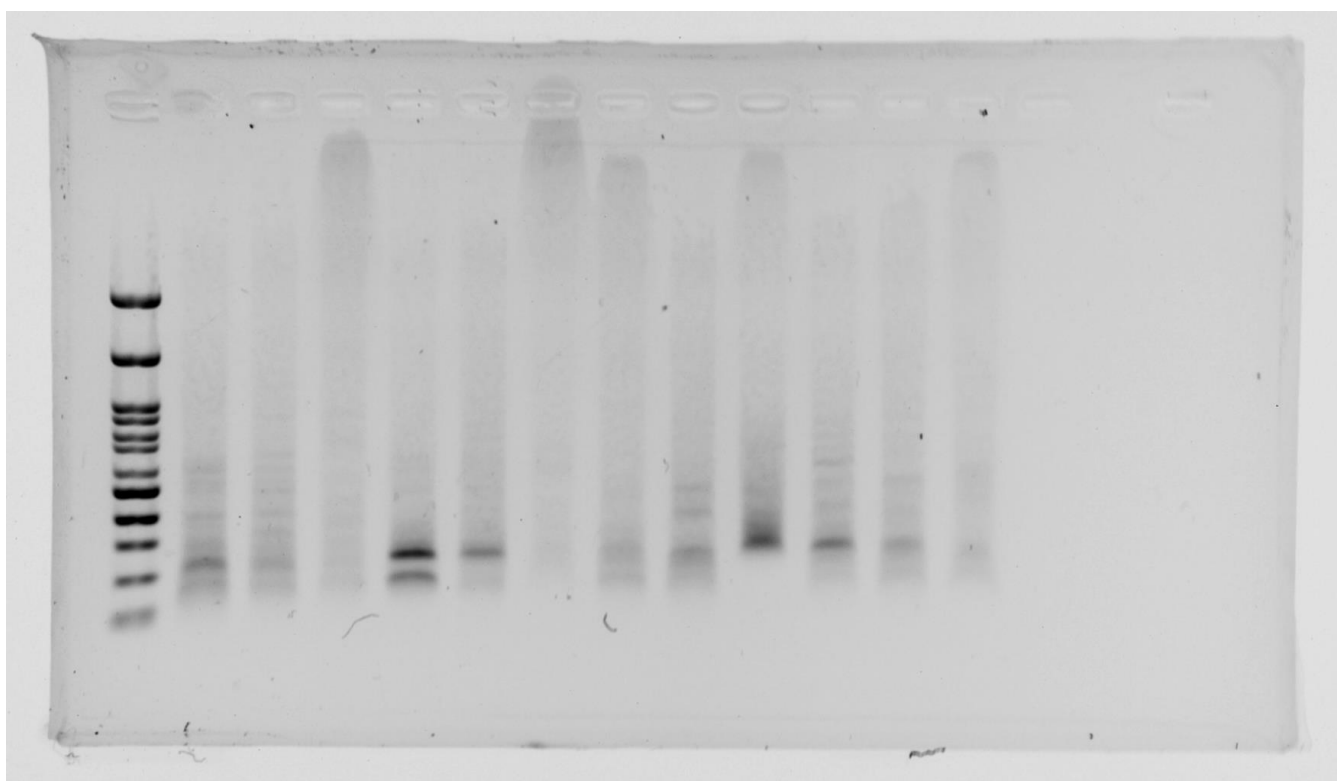

Patient 13: HR51, 58

Patient 4: HR16, 18, 51,  
58, 59, 68; LR42

Patient 5: HR56

Other positive and negative  
patient samples

---

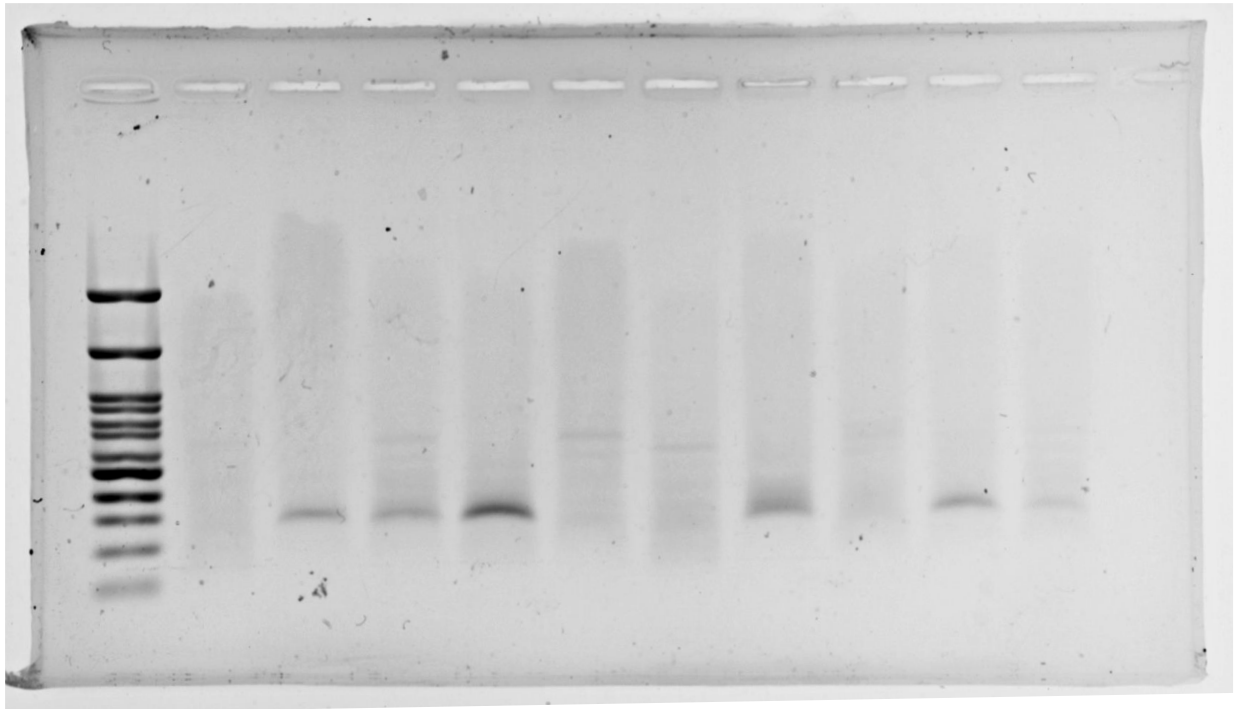

Positive patient:  
HR45, 66, 70

Hepatitis

SARS-CoV-

Influenza

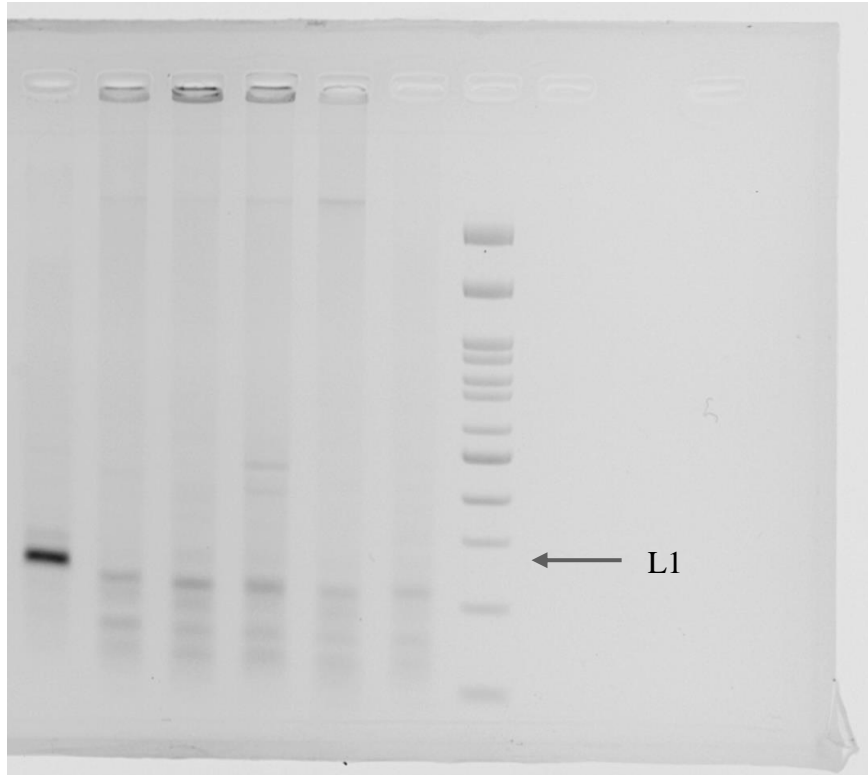



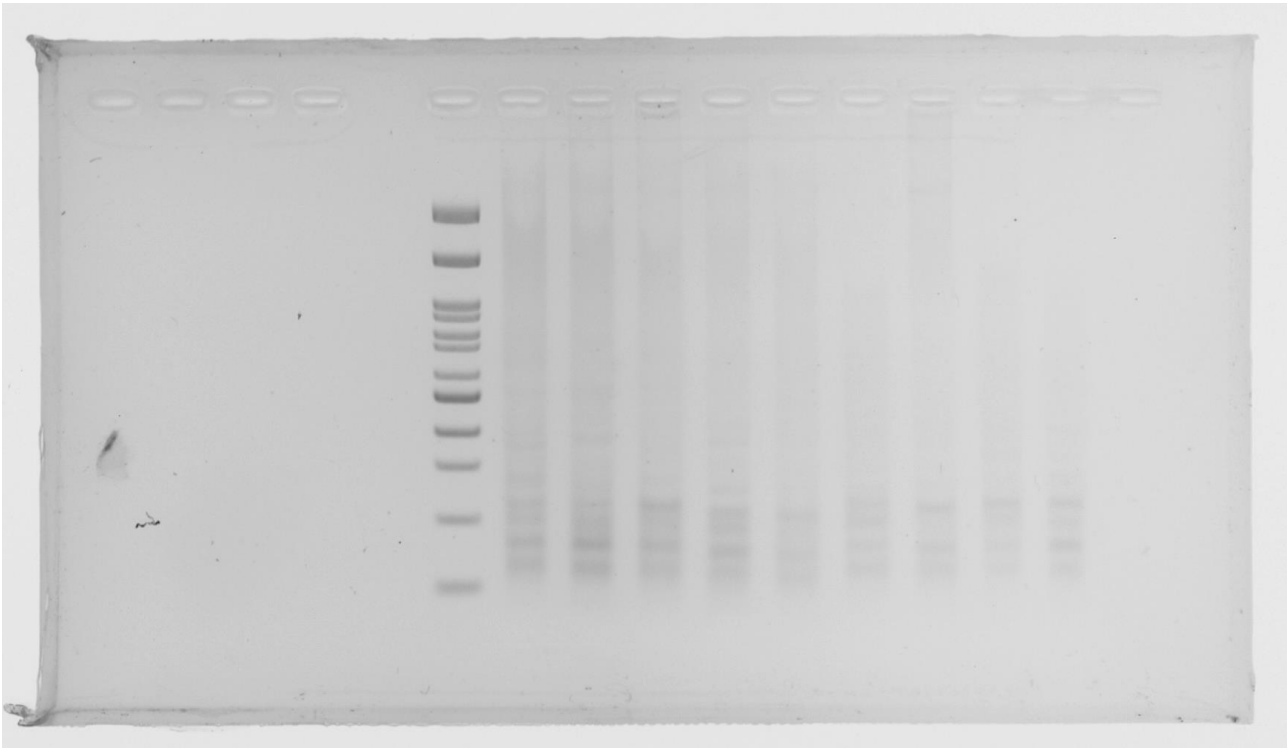

Influenza B

*C. trachomatis*

*N. gonorrhoeae*

*S. saprophyticus*

*S. aureus*

*S. epidermidis*

*E. coli*

*H. sapiens*

*M. musculus*

**Fig 2C**

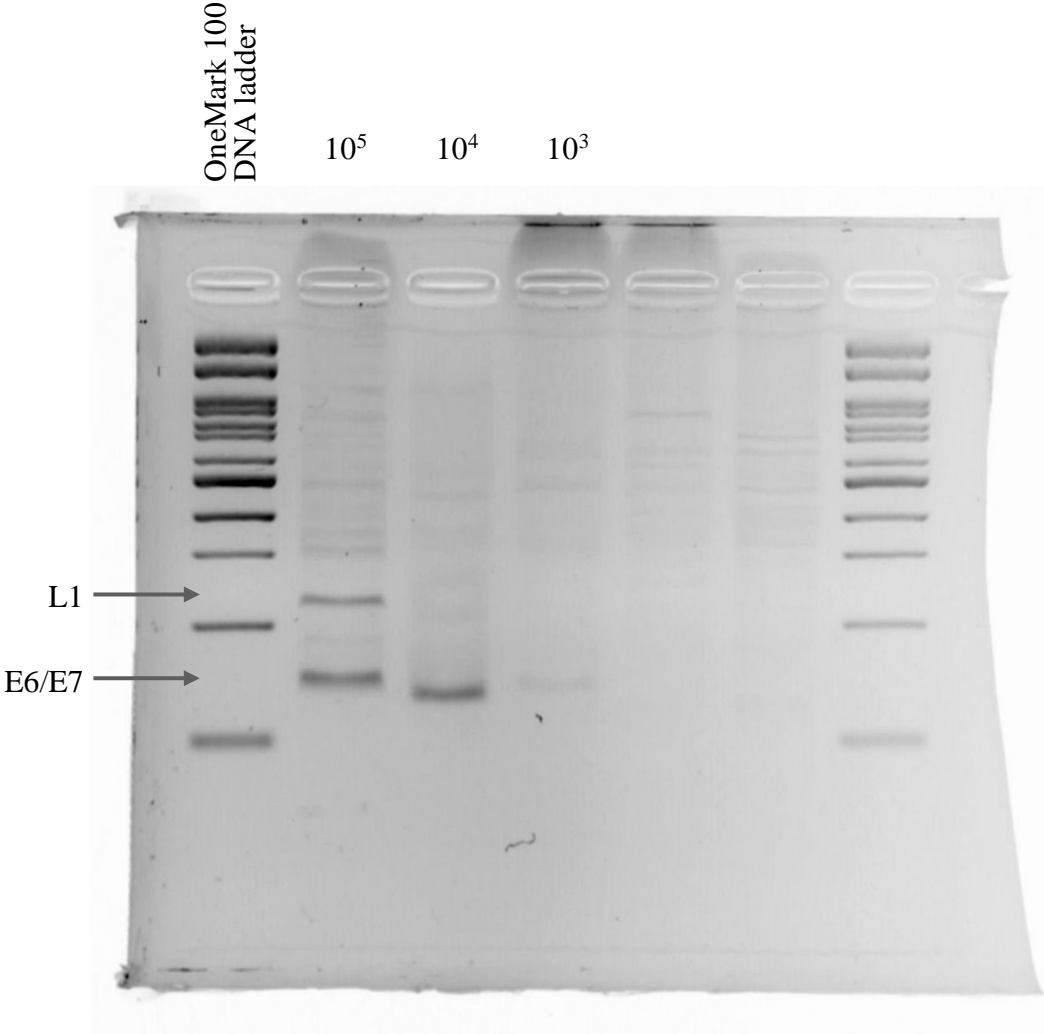

$10^5$

$10^4$

$10^3$

$10^2$

OneMark 100  
DNA ladder

L1 →  
E6/E7 →

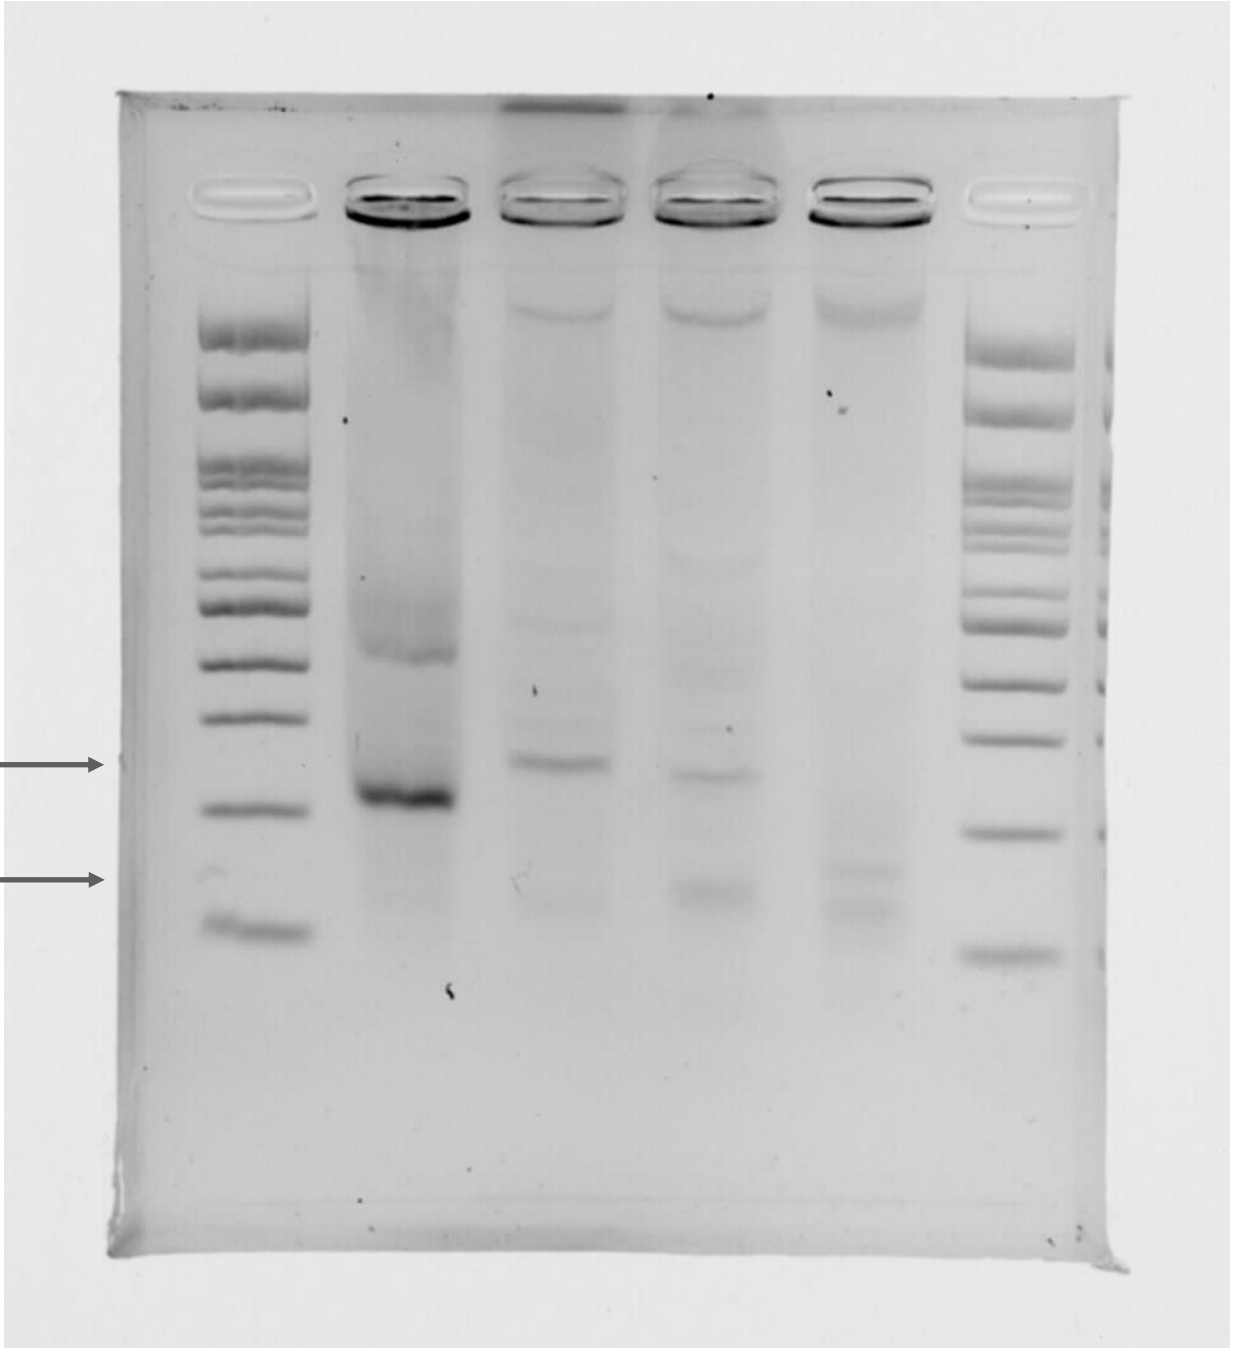

Supplement: 41598_2023_28038_MOESM1_ESM.pdf [file 41598_2023_28038_MOESM1_ESM.pdf]
