# Supplementary material
Source: PubMed Central journal article supplement (PMC9842605)
Supplement: 41598_2023_28038_MOESM3_ESM.pdf [file 41598_2023_28038_MOESM3_ESM.pdf]

**Multiplex recombinase polymerase amplification for high-risk and low-risk type HPV detection, as potential local use in single tube**

Rungdawan Wongsamart<sup>a,b</sup>, Parvapan Bhattarakasol<sup>c,d</sup>, Arkom Chaiwongkot<sup>c,d</sup>, Doonyapong Wongsawaeng<sup>e</sup>, Pilailuk Akkapaiboon Okada<sup>f</sup>, Tanapat Palaga<sup>a</sup>, Asada Leelahavanichkul<sup>c</sup>, Weerapan Khovidhunkit<sup>g</sup>, Deborah Dean<sup>h,i,j</sup>, Naraporn Somboonna<sup>a,b,k\*</sup>

**Supplementary Figures and Tables**

**Supplemental Figure 1.** Minimal multiplex primer concentration for L1 (**A**), E6/E7 (**B**), and both L1 and E6/E7 (**C**) PCR.

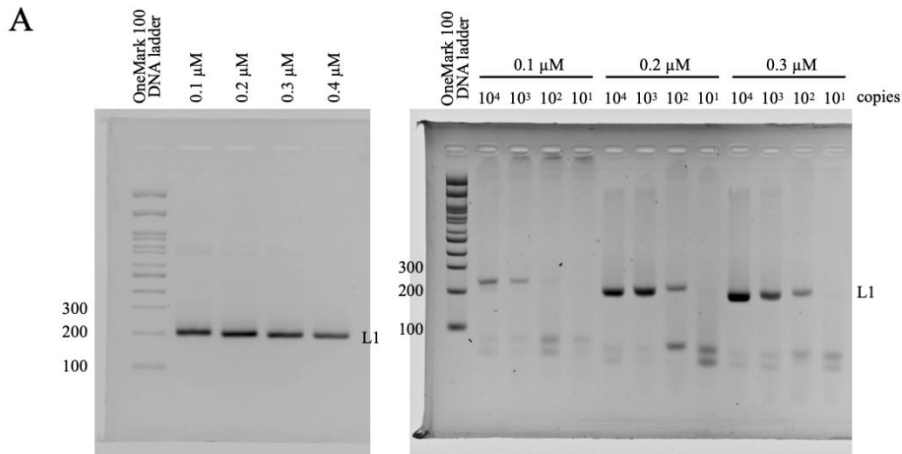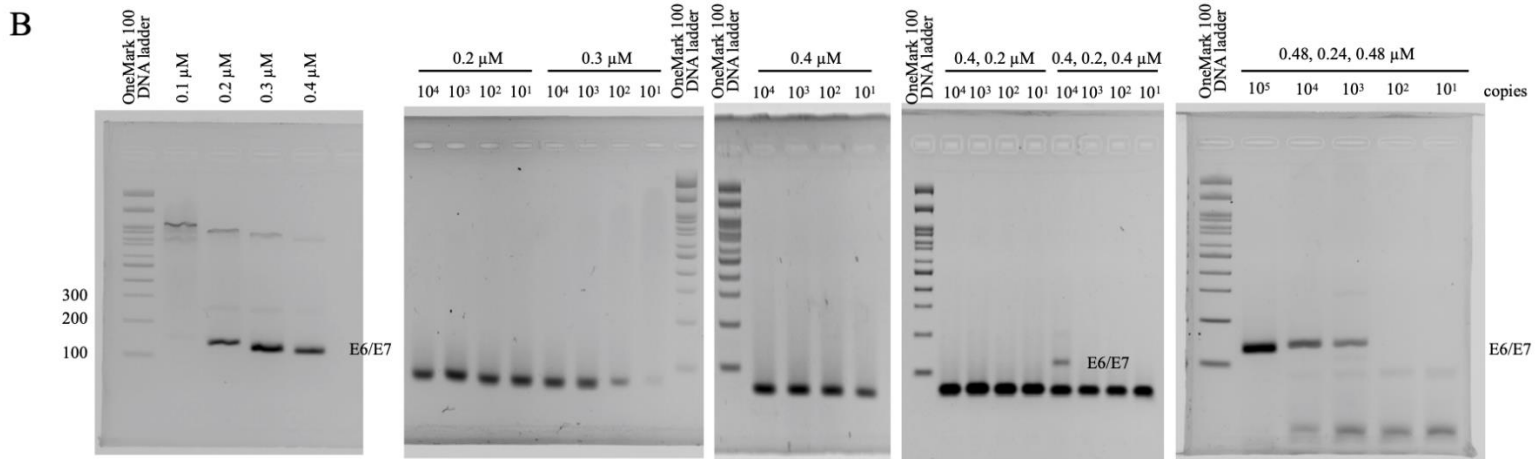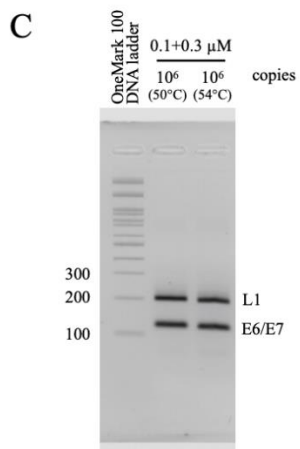

**Supplemental Figure 2.** Agarose electrophoretic images of mRPA reaction at optimal reaction conditions using single E6/E7 template.

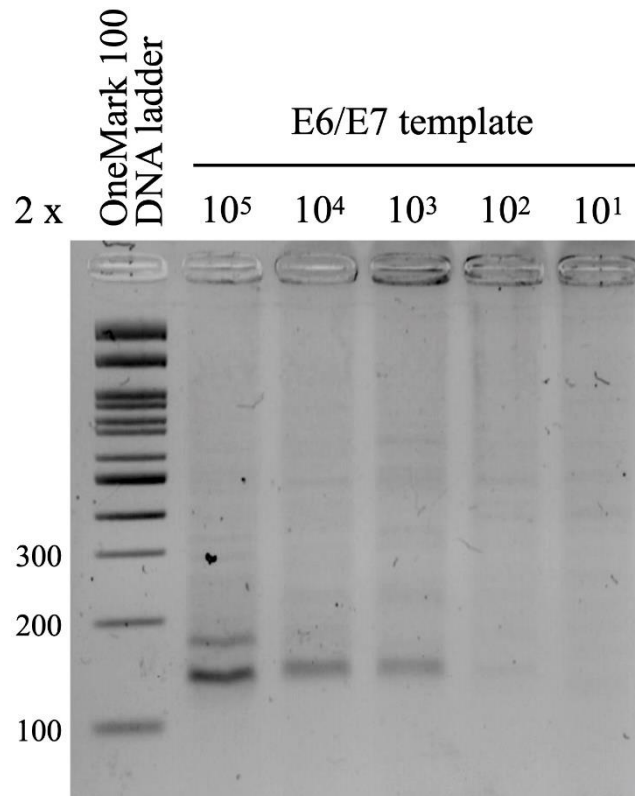

**Supplemental Table 1.** PCR primers for HPV L1 and E6/E7 genes of HR (types 18 and 33) and LR (11).

| Target gene and HPV type | Primer name    | Sequences (5' → 3')            | Annealing temp. (°C) | Product size (bp) |
|--------------------------|----------------|--------------------------------|----------------------|-------------------|
| L1 HPV18                 | PCR_L1-HPV18F  | CCTGGCAGCTGTGTGTATTC           | 63                   | 669               |
|                          | PCR_L1-HPV18R  | TTACTTCCTGGCACGTACAC           |                      |                   |
| L1 HPV11                 | PCR_L1-HPV11F  | AGTGGTGGGTATGGTGGT             | 61                   | 1056              |
|                          | PCR_L1-HPV11R  | TATACCTGTACGAGCAGACG           |                      |                   |
| E6/7 HPV18               | PCR_E6/7HPV18F | ACAAGCTACCTGATCTGTGC           | 61                   | 729               |
|                          | PCR_E6/7HPV18R | AGGACAGGGTGTTTCAGAA            |                      |                   |
| E6/7 HPV33               | RPA_HP_VR_F    | GAGGTATATGAYTTTGCTTTTCSWGATTTA | 65                   | 492               |
|                          | E6/7HPV33R     | CTGTGGCTGGTTGTDCTTGTCCATCTGGC  |                      |                   |
